# Supplementary material for: The underappreciated potential of peatlands in global climate change mitigation strategies
Source: PubMed Central journal article supplement (PMC5851997; doi:10.1038/s41467-018-03406-6), 2018-03-14
Supplement: 41467_2018_3406_MOESM3_ESM.pdf [file 41467_2018_3406_MOESM3_ESM.pdf]

## **Description of Additional Supplementary Files**

File Name: Supplementary Data 1

Description: Organic carbon, nitrogen, and soil C/N ratios of tropical peatlands.
