# Supplementary material for: The underappreciated potential of peatlands in global climate change mitigation strategies
Source: PubMed Central journal article supplement (PMC5851997; doi:10.1038/s41467-018-03406-6), 2018-03-14
Supplement: 41467_2018_3406_MOESM4_ESM.pdf [file 41467_2018_3406_MOESM4_ESM.pdf]

Organic carbon, nitrogen, and soil C/N ratios of tropical peatlands.

| Source                                 | Wise ID | Country   | Land use                | pH      | Soil organic C (%) | Soil N (%) | C/N  | Comment    |
|----------------------------------------|---------|-----------|-------------------------|---------|--------------------|------------|------|------------|
| Mu, Huang <sup>2</sup>                 |         | Malaysia  | forest                  | 3.4     | 44.7               | 2          | 23.4 |            |
| Mu, Huang <sup>2</sup>                 |         | Malaysia  | forest                  | 3.6     | 47.8               | 1.8        | 27.2 |            |
| Mu, Huang <sup>2</sup>                 |         | Malaysia  | forest                  | 3.6     | 44.6               | 2          | 22.6 |            |
| Mu, Huang <sup>2</sup>                 |         | Indonesia | forest                  | 3.4     | 57.9               | 0.9        | 63.6 |            |
| Mu, Huang <sup>2</sup>                 |         | Indonesia | forest                  | 3       | 54.3               | 1.7        | 31.9 |            |
| Mu, Huang <sup>2</sup>                 |         | Indonesia | forest                  | 3.4     | 58.2               | 0.8        | 69.3 |            |
| Mu, Huang <sup>2</sup>                 |         | Indonesia | cropland                | 3.8     | 48.6               | 1          | 50.6 |            |
| Mu, Huang <sup>2</sup>                 |         | Indonesia | cropland                | 3.8     | 61.3               | 1.5        | 40.9 |            |
| Mu, Huang <sup>2</sup>                 |         | Indonesia | forest                  | 3.2     | 48.6               | 1.6        | 30.6 |            |
| Anshari, Afifudin <sup>3</sup>         |         | Indonesia | forest                  | 3.6     | 51.8               | 1.8        | 28   |            |
| Anshari, Afifudin <sup>3</sup>         |         | Indonesia | forest                  | 3.6     | 52.1               | 2.3        | 22.3 |            |
| Anshari, Afifudin <sup>3</sup>         |         | Malaysia  | reclaimed coastal swamp | no data | 56.3               | 2.1        | 27.3 |            |
| Anshari, Afifudin <sup>3</sup>         |         | Malaysia  | reclaimed coastal swamp | no data | 56.3               | 1.4        | 41.2 |            |
| Yonebayashi, Pechayapisit <sup>4</sup> |         | Thailand  | reclaimed coastal swamp | no data | 57.3               | 2.4        | 24   |            |
| Gandaseca, Salimin <sup>5</sup>        |         | Malaysia  | oil palm                | 3.7     | 55.6               | 0.8        | 67.8 |            |
| Gandaseca, Salimin <sup>5</sup>        |         | Malaysia  | oil palm                | 3.2     | 55.7               | 1.7        | 33.5 |            |
| Gandaseca, Salimin <sup>5</sup>        |         | Malaysia  | oil palm                | 4.1     | 54.7               | 0.9        | 59.9 |            |
| Melling, Tan <sup>6</sup>              |         | Malaysia  | forest                  | 3.6     | 48.2               | 1.6        | 30.8 | 0–50 cm    |
| Melling, Tan <sup>6</sup>              |         | Malaysia  | oil palm                | 3.3     | 45.4               | 1.6        | 27.8 | 0–50 cm    |
| Melling, Tan <sup>6</sup>              |         | Malaysia  | sago                    | 3.6     | 45.6               | 1.9        | 24.7 | 0–50 cm    |
| Melling, Tan <sup>6</sup>              |         | Malaysia  | forest                  | 1.9     | 57.5               | 1.9        | 29.7 |            |
| Melling, Tan <sup>6</sup>              |         | Malaysia  | forest                  | 1.9     | 56.4               | 1.9        | 29.7 |            |
| Melling, Tan <sup>6</sup>              |         | Malaysia  | forest                  | 1.8     | 55.5               | 1.8        | 30.3 |            |
| Könönen, Jauhiainen <sup>7</sup>       |         | Indonesia | forest                  | 3.4     | 55.5               | 1.6        | 34.7 |            |
| Könönen, Jauhiainen <sup>7</sup>       |         | Indonesia | forest                  | 3.7     | 57.3               | 1.6        | 36   |            |
| Könönen, Jauhiainen <sup>7</sup>       |         | Indonesia | forest                  | 3       | 61.5               | 0.9        | 71.5 |            |
| Könönen, Jauhiainen <sup>7</sup>       |         | Indonesia | forest                  | 3.1     | 55.5               | 1.9        | 29.5 |            |
| Könönen, Jauhiainen <sup>7</sup>       |         | Indonesia | forest                  | 2.7     | 63.8               | 0.9        | 71.6 |            |
| Könönen, Jauhiainen <sup>7</sup>       |         | Indonesia | forest                  | 2.9     | 59.3               | 0.9        | 68.9 |            |
| Könönen, Jauhiainen <sup>7</sup>       |         | Indonesia | forest                  | 3.1     | 60.4               | 0.7        | 82.7 |            |
| Könönen, Jauhiainen <sup>7</sup>       |         | Indonesia | degraded                | 3.6     | 58.7               | 0.9        | 69.1 |            |
| Könönen, Jauhiainen <sup>7</sup>       |         | Indonesia | degraded                | 3.3     | 58.5               | 0.8        | 73.2 |            |
| Könönen, Jauhiainen <sup>7</sup>       |         | Indonesia | degraded                | 3       | 58.8               | 0.8        | 78.4 |            |
| Könönen, Jauhiainen <sup>7</sup>       |         | Indonesia | degraded                | 3.4     | 57.9               | 0.7        | 82.7 |            |
| Könönen, Jauhiainen <sup>7</sup>       |         | Indonesia | cropland                | 3.3     | 58.6               | 0.9        | 66.6 |            |
| Könönen, Jauhiainen <sup>7</sup>       |         | Indonesia | cropland                | 3.4     | 58.3               | 0.8        | 75.7 |            |
| Könönen, Jauhiainen <sup>7</sup>       |         | Indonesia | cropland                | 3.4     | 59.6               | 0.9        | 67.7 |            |
| Könönen, Jauhiainen <sup>7</sup>       |         | Indonesia | cropland                | 3.5     | 58.2               | 0.7        | 85.6 |            |
| Lawson, Jones <sup>8</sup>             |         | Peru      | natural swamp           | no data | 46.5               | 1.6        | 28.7 | upper peat |
| Arai, Hadi <sup>9</sup>                |         | Indonesia | forest                  | 3.6     | 50.4               | 1.3        | 37.9 |            |
| Arai, Hadi <sup>9</sup>                |         | Indonesia | forest                  | 3.8     | 49.4               | 1.8        | 27.1 |            |
| Arai, Hadi <sup>9</sup>                |         | Indonesia | forest                  | 3.8     | 53.7               | 1.6        | 34.4 |            |
| Arai, Hadi <sup>9</sup>                |         | Indonesia | forest                  | 3.8     | 56.8               | 1.3        | 42.7 |            |
| Arai, Hadi <sup>9</sup>                |         | Indonesia | cropland                | 4.2     | 32.5               | 1.1        | 30.7 |            |
| Arai, Hadi <sup>9</sup>                |         | Indonesia | cropland                | 3.7     | 43.7               | 1.3        | 33.6 |            |
| Arai, Hadi <sup>9</sup>                |         | Indonesia | cropland                | 4.3     | 37.2               | 1          | 37.2 |            |
| Arai, Hadi <sup>9</sup>                |         | Indonesia | cropland                | 5.1     | 33.6               | 1.1        | 30   |            |
| Gandois, Cobb <sup>10</sup>            |         | Brunei    | forest                  | 3.9     | 52.3               | 2.1        | 24.9 |            |
| Gandois, Cobb <sup>10</sup>            |         | Brunei    | forest                  | 4       | 50.6               | 1.9        | 26.6 |            |

|                                       |        |                                        |                                   |         |      |     |      |
|---------------------------------------|--------|----------------------------------------|-----------------------------------|---------|------|-----|------|
| Gandois, Cobb <sup>10</sup>           |        | Brunei                                 | forest                            | 4.1     | 55   | 1.8 | 30.6 |
| Gandois, Cobb <sup>10</sup>           |        | Brunei                                 | forest                            | 4.1     | 51.5 | 1.9 | 27.1 |
| Gandois, Cobb <sup>10</sup>           |        | Brunei                                 | forest                            | 4.1     | 54.7 | 1.8 | 30.4 |
| Gandois, Cobb <sup>10</sup>           |        | Brunei                                 | deforested                        | 4.8     | 50.2 | 1.6 | 31.4 |
| Gandois, Cobb <sup>10</sup>           |        | Brunei                                 | deforested                        | 3.9     | 46.7 | 1.9 | 24.6 |
| Gandois, Cobb <sup>10</sup>           |        | Brunei                                 | deforested                        | 4.1     | 50.2 | 2.3 | 21.8 |
| Gandois, Cobb <sup>10</sup>           |        | Brunei                                 | deforested                        | 4.2     | 51.1 | 2.4 | 21.3 |
| Gandois, Cobb <sup>10</sup>           |        | Brunei                                 | deforested                        | 4.4     | 47.4 | 2.8 | 16.9 |
| Gandois, Cobb <sup>10</sup>           |        | Brunei                                 | deforested                        | 3.7     | 51.1 | 2.9 | 17.6 |
| Gandois, Cobb <sup>10</sup>           |        | Brunei                                 | deforested                        | 3.6     | 52   | 2.6 | 20   |
| Sjögersten,<br>Cheesman <sup>11</sup> |        | Panama                                 | natural swamp                     | 3.8     | 49   | 2.4 | 20.6 |
| Sjögersten,<br>Cheesman <sup>11</sup> |        | Panama                                 | natural swamp                     | 3.7     | 48.1 | 2.6 | 18.6 |
| Sjögersten,<br>Cheesman <sup>11</sup> |        | Panama                                 | natural swamp                     | 3.9     | 48.9 | 2.7 | 18.4 |
| Sjögersten,<br>Cheesman <sup>11</sup> |        | Panama                                 | natural swamp                     | 4       | 49.7 | 2.6 | 18.8 |
| Sjögersten,<br>Cheesman <sup>11</sup> |        | Panama                                 | natural swamp                     | 4       | 50.2 | 2.5 | 20.1 |
| Chimner and<br>Ewel <sup>12</sup>     |        | Micronesia                             | forest                            | 6.4     | 19.9 | 1.2 | 16.6 |
| Chimner and<br>Ewel <sup>12</sup>     |        | Micronesia                             | forest                            | 5.9     | 47   | 2.3 | 20.1 |
| Hadi, Inubushi <sup>13</sup>          |        | Indonesia                              | forest                            | 3.3     | 13.1 | 0.6 | 22.6 |
| Hadi, Inubushi <sup>13</sup>          |        | Indonesia                              | paddy field                       | 3.4     | 20.2 | 0.6 | 31.5 |
| Hadi, Inubushi <sup>13</sup>          |        | Indonesia                              | cropland                          | 3.3     | 14.3 | 0.5 | 28.7 |
| Hadi, Inubushi <sup>13</sup>          |        | Indonesia                              | forest                            | 3.2     | 31.7 | 0.7 | 46.6 |
| Hadi, Inubushi <sup>13</sup>          |        | Indonesia                              | paddy field                       | 3.7     | 37.7 | 0.7 | 55.4 |
| Hadi, Inubushi <sup>13</sup>          |        | Indonesia                              | cropland                          | 3.5     | 61.6 | 1.2 | 50.5 |
| Hadi, Inubushi <sup>13</sup>          |        | Indonesia                              | forest                            | 4.5     | 18   | 0.7 | 24.4 |
| Hadi, Inubushi <sup>13</sup>          |        | Indonesia                              | forest                            | 4.4     | 46.5 | 1.8 | 26.1 |
| Hadi, Inubushi <sup>13</sup>          |        | Indonesia                              | paddy field                       | 4.4     | 50.7 | 1.5 | 33.2 |
| Hadi, Inubushi <sup>13</sup>          |        | Indonesia                              | cropland                          | 4.6     | 57.4 | 1.3 | 43.5 |
| Adame, et al. <sup>14</sup>           |        | Mexico                                 | peat swamp                        | no data | 21.8 | 1.3 | 16.8 |
|                                       |        |                                        | forest                            |         |      |     |      |
| Batjes <sup>15</sup>                  | BD0017 | Bangladesh                             | unknown                           | 5.5     | 40.7 | 2.1 | 19.5 |
| Batjes <sup>15</sup>                  | CD0130 | Democratic<br>Republic Of The<br>Congo | unknown                           | 6.2     | 19.3 | 0.3 | 66   |
| Batjes <sup>15</sup>                  | CO0041 | Colombia                               | unknown                           | 4.5     | 20.6 | 1.4 | 14.6 |
| Batjes <sup>15</sup>                  | CO0057 | Colombia                               | unknown                           | 4.7     | 33.3 | 1.6 | 20.3 |
| Batjes <sup>15</sup>                  | CO0058 | Colombia                               | unknown                           | 4.8     | 42.6 | 1.6 | 27   |
| Batjes <sup>15</sup>                  | CO0060 | Colombia                               | unknown                           | 4.4     | 45.4 | 1.3 | 35.3 |
| Batjes <sup>15</sup>                  | CO0062 | Colombia                               | unknown                           | 4.4     | 32.1 | 1.9 | 17   |
| Batjes <sup>15</sup>                  | GY0024 | Guyana                                 | unknown                           | 3.7     | 16.2 | 0.7 | 24.6 |
| Batjes <sup>15</sup>                  | GY0025 | Guyana                                 | unknown                           | 3.7     | 29.5 | 0.6 | 48.7 |
| Pajunen <sup>16</sup>                 |        | Rwanda                                 | natural swamp                     | 5       | 52.2 | 1.9 | 27.5 |
| Pajunen <sup>16</sup>                 |        | Rwanda                                 | natural swamp                     | 5       | 42.6 | 1.9 | 22.4 |
| Pajunen <sup>16</sup>                 |        | Rwanda                                 | natural swamp                     | no data | 52   | 1.6 | 32.5 |
| Pajunen <sup>16</sup>                 |        | Rwanda                                 | natural swamp                     | no data | 53.9 | 1.8 | 29.9 |
| Pajunen <sup>16</sup>                 |        | Rwanda                                 | natural swamp                     | no data | 50.2 | 1.7 | 29.5 |
| Pajunen <sup>16</sup>                 |        | Rwanda                                 | cropland                          | 4.9     | 57.8 | 1.8 | 32.1 |
| Pajunen <sup>16</sup>                 |        | Rwanda                                 | cropland                          | 4.9     | 54.9 | 1.9 | 28.9 |
| Pajunen <sup>16</sup>                 |        | Rwanda                                 | cropland                          | 4.9     | 54.1 | 1.8 | 30.1 |
| Pajunen <sup>16</sup>                 |        | Rwanda                                 | cropland                          | 4.9     | 56.5 | 1.4 | 40.4 |
| Pajunen <sup>16</sup>                 |        | Rwanda                                 | natural bog                       | 3.4     | 55.9 | 1.3 | 43   |
| Pajunen <sup>16</sup>                 |        | Rwanda                                 | abandoned peat<br>extraction site | 4.7     | 52.6 | 1.6 | 32.9 |
| Pajunen <sup>16</sup>                 |        | Rwanda                                 | peat extraction<br>site           | 5.5     | 54.5 | 1.6 | 34.1 |
| Hope <sup>17</sup>                    |        | PNG <sup>1</sup>                       | natural peatland                  | 4       | 13.4 | 0.9 | 14.9 |
| Hope <sup>17</sup>                    |        | PNG <sup>1</sup>                       | natural peatland                  | 5.8     | 21   | 0.5 | 42   |
| Hope <sup>17</sup>                    |        | PNG <sup>1</sup>                       | natural peatland                  | 6.7     | 35.4 | 1.4 | 25.3 |
| Hope <sup>17</sup>                    |        | PNG <sup>1</sup>                       | natural peatland                  | 6.4     | 31.2 | 1.1 | 28.4 |
| Hope <sup>17</sup>                    |        | PNG <sup>1</sup>                       | natural peatland                  | 5.4     | 16.8 | 0.9 | 18.7 |

|                                   |                  |                  |         |      |     |      |
|-----------------------------------|------------------|------------------|---------|------|-----|------|
| Hope <sup>17</sup>                | PNG <sup>1</sup> | natural peatland | 5.7     | 18.8 | 1.3 | 14.5 |
| Hope <sup>17</sup>                | PNG <sup>1</sup> | natural peatland | 6       | 35.2 | 0.9 | 39.1 |
| Hope <sup>17</sup>                | PNG <sup>1</sup> | natural peatland | 3.4     | 22.7 | 2.3 | 10   |
| Hope <sup>17</sup>                | PNG <sup>1</sup> | natural peatland | 6.1     | 37   | 1.6 | 23.1 |
| Hope <sup>17</sup>                | PNG <sup>1</sup> | natural peatland | 5.9     | 29.5 | 1   | 29.5 |
| Hope <sup>17</sup>                | PNG <sup>1</sup> | natural peatland | 5.6     | 13.9 | 0.8 | 17.4 |
| Hope <sup>17</sup>                | PNG <sup>1</sup> | natural peatland | 5.6     | 15.8 | 0.8 | 19.8 |
| Hribljan, Cooper<br><sub>18</sub> | Bolivia          | grazed           | no data | 23.9 | 1.1 | 21.7 |
| Hribljan, Cooper<br><sub>18</sub> | Bolivia          | grazed           | no data | 47.8 | 2   | 23.9 |

---

|                     |            |             |            |             |
|---------------------|------------|-------------|------------|-------------|
| <b><i>n</i></b>     | <b>102</b> | <b>112</b>  | <b>112</b> | <b>112</b>  |
| <b>mean</b>         | <b>4.1</b> | <b>45.3</b> | <b>1.5</b> | <b>35</b>   |
| <b>median</b>       | <b>3.8</b> | <b>50.2</b> | <b>1.6</b> | <b>29.7</b> |
| <b>upper 95% CI</b> | <b>4.3</b> | <b>47.9</b> | <b>1.6</b> | <b>38.4</b> |
| <b>lower 95% CI</b> | <b>3.9</b> | <b>42.7</b> | <b>1.4</b> | <b>31.7</b> |
| <b>1 SD</b>         | <b>1</b>   | <b>13.9</b> | <b>0.6</b> | <b>17.8</b> |

---

<sup>1</sup> Papua New Guinea
